# Supplementary material
Source: PubMed Central journal article supplement (PMC2515087)
Supplement: jc.2008-0425_3.pdf [file jc.2008-0425_3.pdf]

**Online Supplemental Table 3: Logistic regression models predicting insulin resistance (homeostasis model insulin resistance (HOMA-IR) >75<sup>th</sup> percentile) in Framingham Offspring Study subjects, according to Metabolic Syndrome status and adipokine level, adjusted for waist circumference.**

|                                | <b>Adjusted for Sex, Age, and waist circumference</b>                          |                                              |                               |                                             |
|--------------------------------|--------------------------------------------------------------------------------|----------------------------------------------|-------------------------------|---------------------------------------------|
|                                | <b>Metabolic syndrome (yes vs no)<sup>a</sup></b>                              | <b>Adiponectin (per tertile)<sup>b</sup></b> | <b>Resistin (per tertile)</b> | <b>TNF<math>\alpha</math> (per tertile)</b> |
|                                | <b>Individual Models<sup>c</sup> (Metabolic syndrome <i>or</i> adipokines)</b> |                                              |                               |                                             |
| <b>Coefficient<sup>d</sup></b> | 1.65                                                                           |                                              |                               |                                             |
| <b>OR (95% CI)</b>             | 5.23 (4.07-6.71)                                                               |                                              |                               |                                             |
| <b>p-value</b>                 | <.0001                                                                         |                                              |                               |                                             |
| <b>Coefficient</b>             |                                                                                | -0.88                                        |                               |                                             |
| <b>OR (95% CI)</b>             |                                                                                | 0.42 (0.36-0.48)                             |                               |                                             |
| <b>p-value</b>                 |                                                                                | <.0001                                       |                               |                                             |
| <b>Coefficient</b>             |                                                                                |                                              | 0.15                          |                                             |
| <b>OR (95% CI)</b>             |                                                                                |                                              | 1.17 (1.02-1.33)              |                                             |
| <b>p-value</b>                 |                                                                                |                                              | 0.03                          |                                             |
| <b>Coefficient</b>             |                                                                                |                                              |                               | 0.28                                        |
| <b>OR (95% CI)</b>             |                                                                                |                                              |                               | 1.32 (1.15-1.53)                            |
| <b>p-value</b>                 |                                                                                |                                              |                               | 0.0001                                      |
|                                | <b>Metabolic syndrome + One Adipokine Models</b>                               |                                              |                               |                                             |
| <b>Coefficient</b>             | 1.44                                                                           | -0.73                                        |                               |                                             |
| <b>OR (95% CI)</b>             | 4.23 (3.27-5.48)                                                               | 0.48 (0.41-0.57)                             |                               |                                             |
| <b>p-value</b>                 | <.0001                                                                         | <.0001                                       |                               |                                             |
| <b>Coefficient</b>             | 1.66                                                                           |                                              | 0.16                          |                                             |
| <b>OR (95% CI)</b>             | 5.25 (4.08-6.74)                                                               |                                              | 1.18 (1.02-1.36)              |                                             |
| <b>p-value</b>                 | <.0001                                                                         |                                              | 0.02                          |                                             |
| <b>Coefficient</b>             | 1.62                                                                           |                                              |                               | 0.24                                        |
| <b>OR (95% CI)</b>             | 5.07 (3.90-6.60)                                                               |                                              |                               | 1.28 (1.10-1.49)                            |
| <b>p-value</b>                 | <.0001                                                                         |                                              |                               | 0.002                                       |
|                                | <b>Full Model</b>                                                              |                                              |                               |                                             |
| <b>Coefficient</b>             | 1.43                                                                           | -0.71                                        | 0.14                          | 0.17                                        |
| <b>OR (95% CI)</b>             | 4.20 (3.20-5.52)                                                               | 0.49 (0.42-0.58)                             | 1.15 (0.98-1.34)              | 1.18 (1.01-1.39)                            |
| <b>p-value</b>                 | <.0001                                                                         | <.0001                                       | 0.08                          | 0.04                                        |

Age, sex, and waist circumference were modeled as continuously-distributed covariates.

<sup>a</sup> Odds ratios (OR) for metabolic syndrome are for subjects with metabolic syndrome relative to those without.

<sup>b</sup> Adipokine levels are modeled as ordinal variables (0, 1, 2) with regression coefficients and associated odds ratios (OR) and 95% confidence intervals (CI) expressed as risk per tertile increase.

<sup>c</sup> Individuals models are using each variable (Metabolic syndrome *or* each adipokine levels by tertile) by itself to predict prevalence of insulin resistance, adjusted for age, sex, and waist circumference

<sup>d</sup> Coefficients are the beta coefficients for each variable when included in the multivariable logistic regression analysis.
